# Supplementary material for: A kinesin with calponin-homology domain is involved in premitotic nuclear migration
Source: PubMed Central journal article supplement — J Exp Bot. 2010 Jun 21;61(12):3423–37. doi: 10.1093/jxb/erq164 (PMC2905203; doi:10.1093/jxb/erq164), 2010-06-21

# **A kinesin with calponin-homology domain is involved in premitotic nuclear migration**

*Nicole Frey, Jan Klotz, and Peter Nick*

## Supplementary Material

**Figure S1:** Colocalization of OsKCH1 with microtubules and actin filaments in tobacco BY-2 cells

**Video S1:** Cell stably expressing GFP KCH1-800 during early stages of mitosis. BY-2 cells stably expressing GFP KCH1-800. Fluorescence was tracked in a cell during the early stages of mitosis over a time course of 2 h. Images were taken every 3 min. Movie format: AVI

**Video S2:** Cells stably expressing GFP KCH1-800 during cytokinesis. BY-2 cells stably expressing GFP KCH1-800. Fluorescence was tracked in cells during cytokinesis over a time course of 2.5 h. Images were taken every 3 min. Movie format: AVI

**Video S3:** Cells stably expressing GFP KCH1-800 subsequent cytokinesis. BY-2 cells stably expressing GFP KCH1-800. Fluorescence was tracked in an interphasic cell over a time course of 1.5 h. Images were taken every 3 min. Movie format: AVI

**Video S4:** Cells stably expressing GFP KCH1-800 during interphase. BY-2 cells stably expressing GFP KCH1-800. Fluorescence was tracked in an interphasic cell over a time course of 1.5 h. Images were taken every 3 min. Movie format: AVI

**Videos S1-S4** – see separate files



**A** OsKCH1 (KCH) and microtubules (MT) in tobacco BY-2 cells

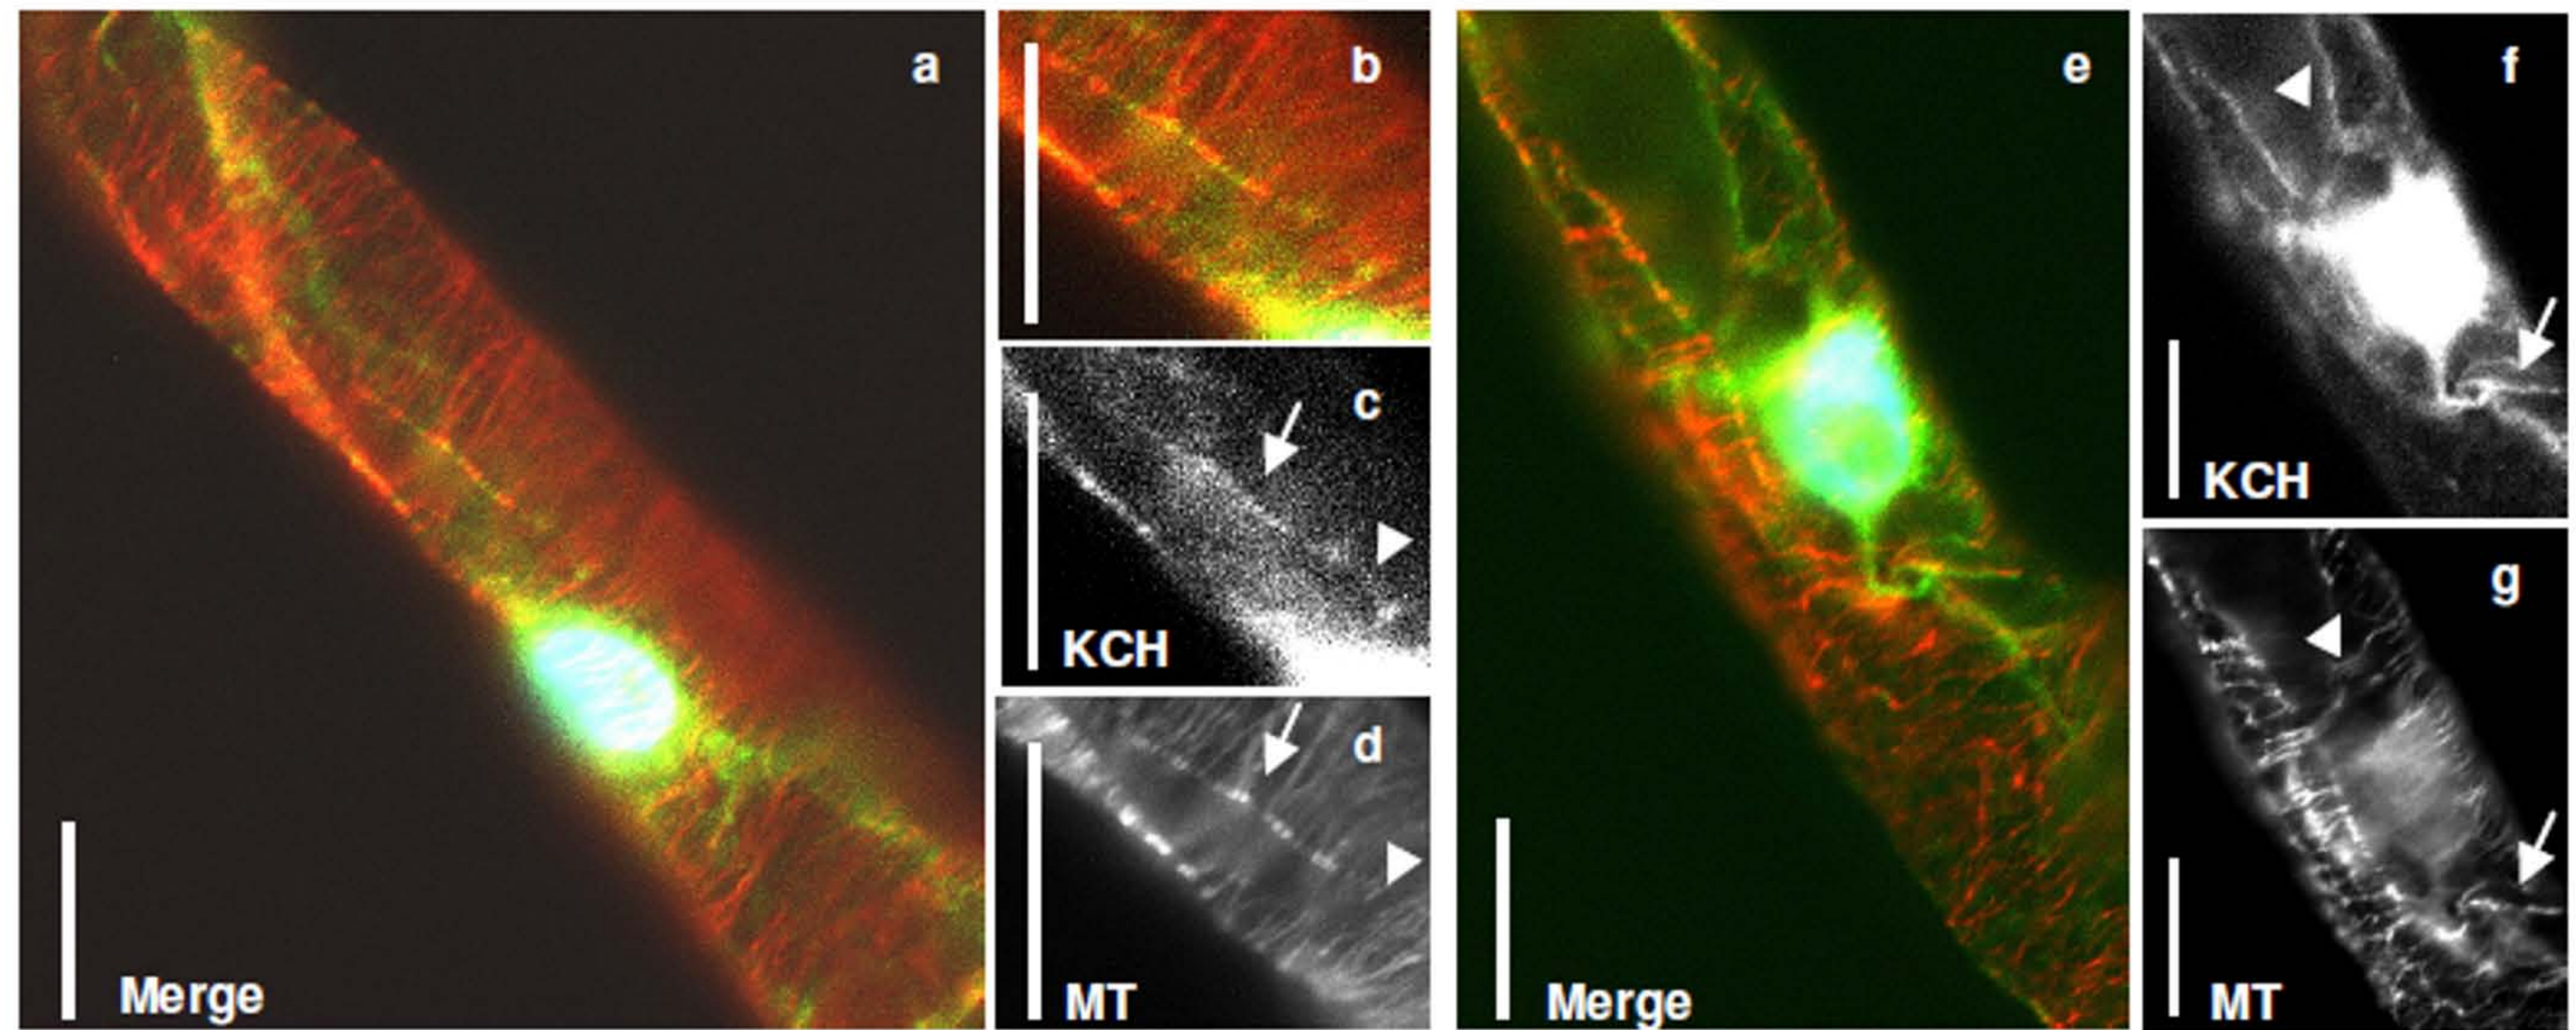

**B** OsKCH1 (KCH) and actin microfilaments (MF) in tobacco BY-2 cells

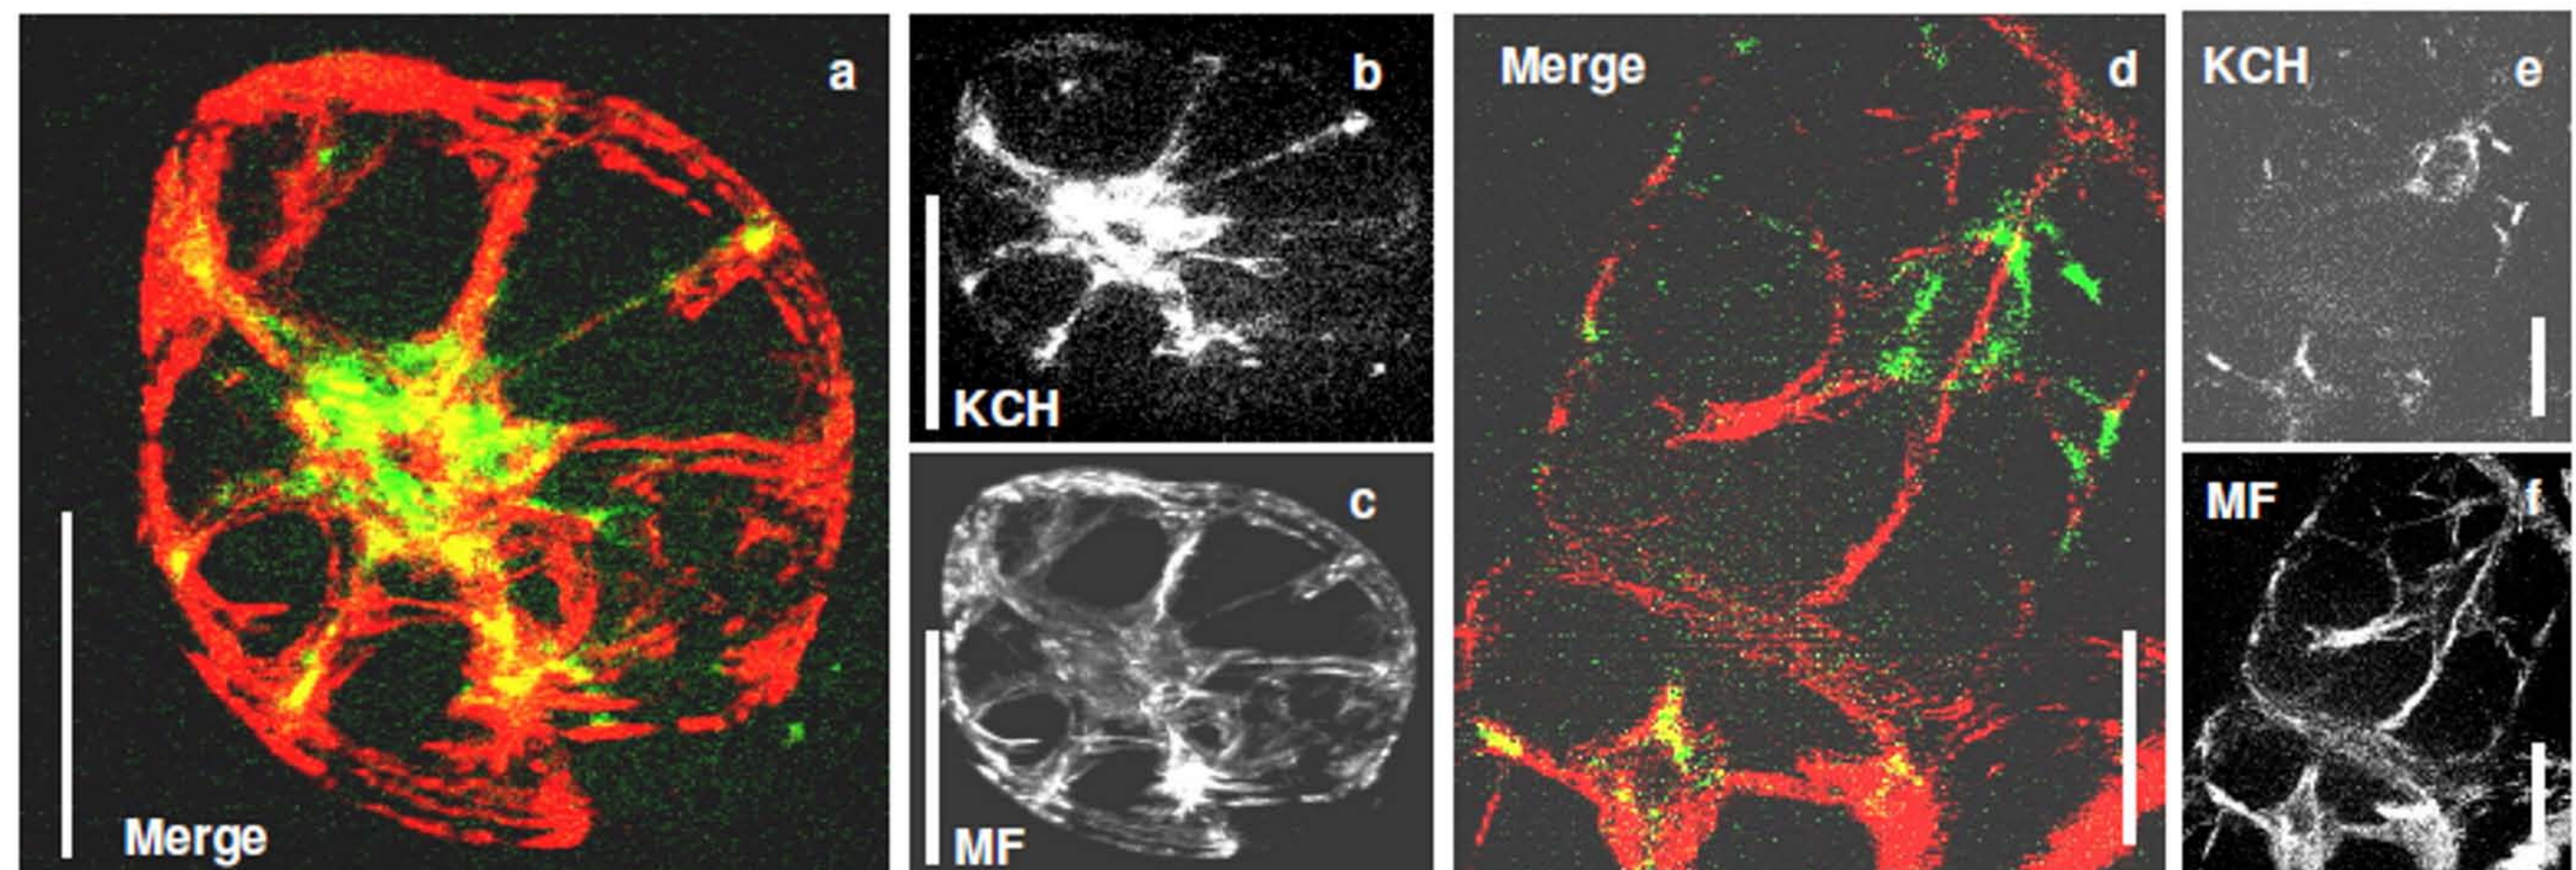

Supplement: erq164_1.pdf [file erq164_1.pdf]
